# Supplementary material
Source: MDPI journal article supplement (https://www.mdpi.com/2073-4433/13/1/41)
Supplement: s1 [file s1]

## Supplementary Materials:

# Drought Assessment in São Francisco River Basin, Brazil: Characterization through SPI and Associated Anomalous Climate Patterns

Aline A. Freitas <sup>1</sup>, Anita Drumond <sup>2,\*</sup>, Vanessa S. B. Carvalho <sup>1</sup>, Michelle S. Reboita <sup>1</sup>, Benedito C. Silva <sup>1</sup> and Cintia B. Uvo <sup>3,4</sup>

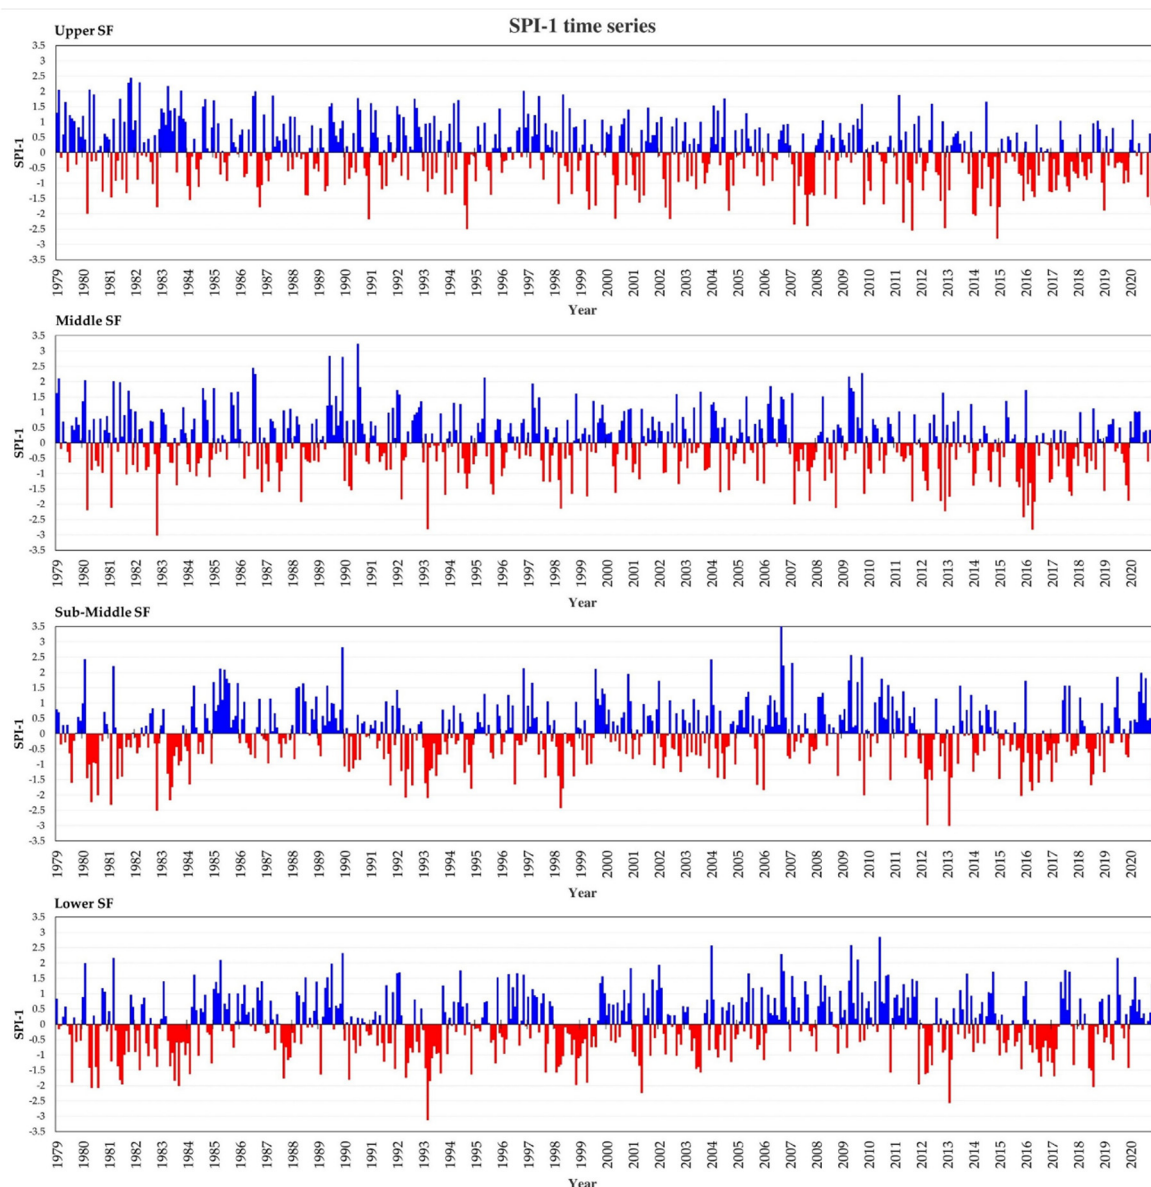

**Figure S1.** SPI-1 time series for the four SF regions for the period Jan 1979–Dec 2020.

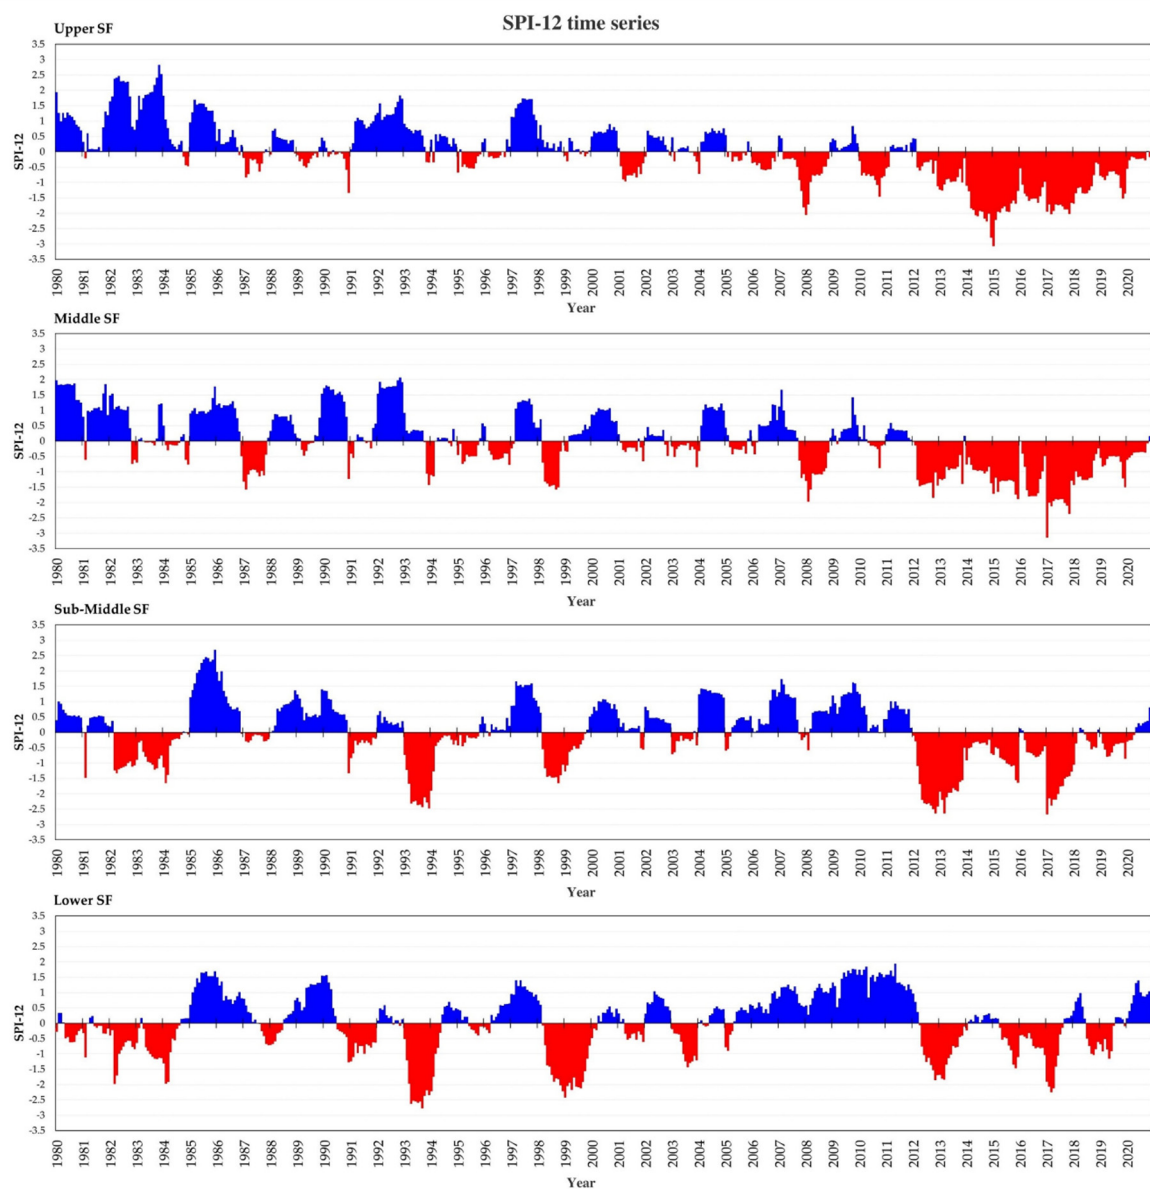

**Figure S2.** SPI-12 time series for the four SF regions for the period Jan 1980–Dec 2020.
